# Supplementary material for: A comprehensive breath test that confirms recent use of inhaled cannabis within the impairment window
Source: PubMed Central journal article supplement (PMC8611040; doi:10.1038/s41598-021-02137-x), 2021-11-23
Supplement: 41598_2021_2137_MOESM1_ESM.pdf [file 41598_2021_2137_MOESM1_ESM.pdf]

## **SUPPLEMENTARY MATERIALS**

### **A Comprehensive Breath Test that Confirms Recent Use of Inhaled Cannabis within the Impairment Window**

Michael W. DeGregorio, Gregory T. Wurz, Edward Montoya, Chiao-Jung Kao

**Supplementary Table S1. Clinical subject demographics**

| <b>Subject</b> | <b>Age</b> | <b>Sex</b> |
|----------------|------------|------------|
| 1              | 23         | M          |
| 2              | 22         | M          |
| 3              | 42         | M          |
| 4              | 23         | M          |
| 5              | 21         | M          |
| 6              | 24         | M          |
| 7              | 23         | F          |
| 8              | 29         | M          |
| 9              | 23         | M          |
| 10             | 23         | M          |
| 11             | 23         | F          |
| 12             | 25         | M          |
| 13             | 23         | F          |
| 14             | 23         | M          |
| 15             | 24         | M          |
| 16             | 29         | M          |
| 17             | 25         | M          |
| 18             | 23         | M          |
| 19             | 23         | M          |
| 20             | 42         | M          |
| 21             | 23         | M          |
| 22             | 24         | M          |
| 23             | 24         | M          |
| 24             | 23         | F          |
| 25             | 21         | M          |
| 26             | 23         | M          |
| 27             | 25         | M          |
| 28             | 24         | M          |
| 29             | 23         | M          |
| 30             | 29         | F          |
| 31             | 23         | M          |
| 32             | 22         | M          |
| 33             | 29         | F          |
| 34             | 23         | M          |
| 35             | 23         | M          |
| 36             | 22         | F          |
| 37             | 29         | M          |
| 38             | 24         | M          |
| 39             | 22         | F          |
| 40             | 42         | M          |

| <b>Subject</b> | <b>Age</b> | <b>Sex</b> |
|----------------|------------|------------|
| 41             | 22         | F          |
| 42             | 23         | M          |
| 43             | 23         | M          |
| 44             | 25         | M          |
| 45             | 29         | M          |
| 46             | 24         | M          |
| 47             | 34         | F          |
| 48             | 31         | F          |
| 49             | 23         | M          |
| 50             | 23         | M          |
| 51             | 25         | M          |
| 52             | 23         | M          |
| 53             | 22         | M          |
| 54             | 22         | F          |
| 55             | 24         | M          |
| 56             | 22         | F          |
| 57             | 23         | F          |
| 58             | 33         | F          |
| 59             | 22         | M          |
| 60             | 23         | M          |
| 61             | 26         | M          |
| 62             | 24         | M          |
| 63             | 23         | M          |
| 64             | 24         | M          |
| 65             | 23         | M          |
| 66             | 22         | F          |
| 67             | 22         | M          |
| 68             | 26         | M          |
| 69             | 22         | M          |
| 70             | 24         | M          |
| 71             | 30         | F          |
| 72             | 33         | F          |
| 73             | 22         | M          |
| 74             | 24         | M          |

**Supplementary Table S2. Self-assessed impairment raw data**

| Subject | Self-Assessed Impairment Level (0-10) Post-Smoking (minutes) |     |     |    |     |     |     |     |     |     |     |
|---------|--------------------------------------------------------------|-----|-----|----|-----|-----|-----|-----|-----|-----|-----|
|         | Pre-Smoking                                                  | 0   | 20  | 40 | 60  | 80  | 120 | 140 | 180 | 200 | 240 |
| 1       | 0                                                            | 4   | 6   | —* | 5   | 3   | 1   | 0   | 0   | 0   | —   |
| 2       | 0                                                            | 1   | 3   | —  | 2   | 2   | 0   | 0   | 0   | 0   | —   |
| 3       | 0                                                            | 4   | 5   | —  | 6   | 6   | 5   | 4   | 2   | 0   | —   |
| 4       | 0                                                            | 6.5 | 5.5 | —  | 3   | 1.5 | 0.5 | 0.5 | 0   | 0   | —   |
| 5       | 0                                                            | 3   | 5   | —  | 3   | 1   | 0   | 0   | 0   | 0   | —   |
| 6       | 0                                                            | 8   | 5   | —  | 1   | 0   | 0   | 0   | 0   | 0   | —   |
| 7       | 0                                                            | 6   | 5   | —  | 4   | 4   | 3   | 2   | 1   | 0   | —   |
| 8       | 0                                                            | 2   | 3   | —  | 2   | 2   | 1   | 0   | 0   | 0   | —   |
| 9       | 0                                                            | 5   | 4   | —  | 2   | 0   | 0   | 0   | 0   | 0   | —   |
| 10      | 0                                                            | 8   | 5   | —  | 2   | 1   | 0   | 0   | 0   | 0   | —   |
| 11      | 0                                                            | 6   | 6   | —  | 4   | 3   | 2   | 0   | 0   | 0   | —   |
| 12      | 0                                                            | 10  | 9   | —  | 8   | 8   | 6   | 5   | 3   | 2   | —   |
| 13      | 0                                                            | 5   | 4   | —  | 0   | 0   | 0   | 0   | 0   | 0   | —   |
| 14      | 0                                                            | 6   | 5   | —  | 1   | 1   | 1   | 0   | 0   | 0   | —   |
| 15      | 0                                                            | 6   | 5   | —  | 3   | 2   | 0   | 0   | 0   | 0   | —   |
| 16      | 0                                                            | 3   | 2   | —  | 1   | 1   | 0   | 0   | 0   | 0   | —   |
| 17      | 0                                                            | 3   | 4   | —  | 1   | 0   | 0   | 0   | 0   | 0   | —   |
| 18      | 0                                                            | 7   | 8   | —  | 4   | 4   | 3   | 1   | 1   | 0   | —   |
| 19      | 0                                                            | 6   | 9   | —  | 5   | 4   | 2   | 1   | 0   | 0   | —   |
| 20      | 0                                                            | 1   | 4   | —  | 5   | 4   | 3   | 2   | 1   | 0   | —   |
| 21      | 0                                                            | 8   | 6   | —  | 3   | 0   | 0   | 0   | 0   | 0   | —   |
| 22      | 0                                                            | 7   | 7   | —  | 5   | 2   | 0   | 0   | 0   | 0   | —   |
| 23      | 0                                                            | 9   | 7   | —  | 2   | 1   | 0   | 0   | 0   | 0   | —   |
| 24      | 0                                                            | 7   | 6   | —  | 5   | 4   | 3   | 2   | 1   | 0   | —   |
| 25      | 0                                                            | 5   | 3   | —  | 0   | 0   | 0   | 0   | 0   | 0   | —   |
| 26      | 0                                                            | 3   | 4   | —  | 2   | 1   | 0   | 0   | 0   | 0   | —   |
| 27      | 0                                                            | 10  | 9   | —  | 8   | 6   | 5   | 4   | 3   | 1.5 | —   |
| 28      | 0                                                            | 3   | 5   | —  | 4   | 3   | 1   | 0   | 0   | 0   | —   |
| 29      | 0                                                            | 3   | 3   | —  | 0   | 0   | 0   | 0   | 0   | 0   | —   |
| 30      | 0                                                            | 7   | 5   | —  | 3   | 2   | 1   | 0   | 0   | 0   | —   |
| 31      | 0                                                            | 8.5 | 4   | —  | 2   | 1   | 0   | —   | 0   | —   | —   |
| 32      | 0                                                            | 3   | 3   | —  | 1   | 1   | 0   | —   | 0   | —   | —   |
| 33      | 0                                                            | 7   | 3   | —  | 1   | 0   | 0   | —   | 0   | —   | —   |
| 34      | 0                                                            | 4   | 3   | —  | 0   | 0   | 0   | —   | 0   | —   | —   |
| 35      | 0                                                            | 8   | 5.5 | —  | 3.5 | 3   | 2   | —   | 1.5 | —   | —   |
| 36      | 0                                                            | 7   | 7   | —  | 6   | 5   | 3   | —   | 2   | —   | 0   |
| 37      | 0                                                            | 3   | 2   | —  | 1   | 1   | 0   | —   | 0   | —   | 0   |
| 38      | 0                                                            | 8   | 6   | —  | 4   | 2   | 1   | —   | 0   | —   | 0   |

| Subject | Self-Assessed Impairment Level (0-10) Post-Smoking (minutes) |    |    |    |    |    |     |     |     |     |     |
|---------|--------------------------------------------------------------|----|----|----|----|----|-----|-----|-----|-----|-----|
|         | Pre-Smoking                                                  | 0  | 20 | 40 | 60 | 80 | 120 | 140 | 180 | 200 | 240 |
| 39      | 0                                                            | 6  | 5  | —  | 3  | 1  | 0   | —   | 0   | —   | 0   |
| 40      | 0                                                            | 4  | 4  | —  | 3  | 2  | 1   | —   | 0   | —   | 0   |
| 41      | 0                                                            | 4  | 6  | 5  | 1  | —  | 0   | —   | 0   | —   | —   |
| 42      | 0                                                            | 10 | 9  | 7  | 4  | —  | 3   | —   | 1   | —   | —   |
| 43†     | 0                                                            | 0  | 0  | 0  | 0  | —  | 0   | —   | 0   | —   | —   |
| 44      | 0                                                            | 1  | 0  | 0  | 0  | —  | 0   | —   | 0   | —   | —   |
| 45      | 0                                                            | 2  | 2  | 1  | 0  | —  | 0   | —   | 0   | —   | —   |
| 46      | 0                                                            | 5  | 3  | 3  | 2  | —  | 0   | —   | 0   | —   | —   |
| 47      | 0                                                            | 10 | 6  | 3  | 1  | —  | 1   | —   | 0   | —   | —   |
| 48      | 0                                                            | 5  | 4  | 2  | 1  | —  | 0   | —   | 0   | —   | —   |
| 49      | 0                                                            | 5  | 6  | 6  | 3  | —  | 1   | —   | 0   | —   | —   |
| 50      | 0                                                            | 6  | 7  | 3  | 2  | —  | 0   | —   | 0   | —   | —   |
| 51      | 0                                                            | 10 | 8  | 6  | 4  | —  | 2   | —   | 0   | —   | —   |
| 52      | 0                                                            | 5  | 6  | —  | —  | —  | —   | —   | 4   | 4   | —   |
| 53      | 0                                                            | 8  | 6  | —  | —  | —  | —   | —   | 2   | 0   | —   |
| 54      | 0                                                            | 6  | 4  | —  | —  | —  | —   | —   | 1   | 0   | —   |
| 55      | 0                                                            | 6  | 5  | —  | —  | —  | —   | —   | 0   | 0   | —   |
| 56      | 0                                                            | 5  | 4  | —  | —  | —  | —   | —   | 0   | 0   | —   |
| 57      | 0                                                            | 1  | 5  | —  | —  | —  | —   | —   | 1   | 0   | —   |
| 58      | 0                                                            | 6  | 8  | —  | —  | —  | —   | —   | 4   | 0   | —   |
| 59      | 0                                                            | 8  | 6  | —  | —  | —  | —   | —   | 3   | 0   | —   |
| 60      | 0                                                            | 8  | 6  | —  | —  | —  | —   | —   | 3   | 1   | —   |
| 61      | 0                                                            | 10 | 7  | —  | —  | —  | —   | —   | 2   | 0   | —   |
| 62      | 0                                                            | 8  | 8  | —  | 6  | 5  | —   | —   | 0   | 0   | —   |
| 63      | 0                                                            | 9  | 7  | —  | 5  | 4  | —   | —   | 2   | 1   | —   |
| 64      | 0                                                            | 8  | 7  | —  | 5  | 3  | —   | —   | 3   | 0   | —   |
| 65      | 0                                                            | 8  | 7  | —  | 5  | 4  | —   | —   | 1   | 0   | —   |
| 66      | 0                                                            | —  | 8  | 7  | 7  | —  | —   | —   | 3   | 0   | —   |
| 67      | 0                                                            | —  | 8  | 6  | 4  | —  | —   | —   | 2   | 0   | —   |
| 68      | 0                                                            | —  | 10 | 7  | 4  | —  | —   | —   | 0   | 0   | —   |
| 69      | 0                                                            | —  | 8  | 6  | 5  | —  | —   | —   | 1   | 0   | —   |
| 70      | 0                                                            | —  | 10 | 8  | 7  | —  | —   | —   | 0   | 0   | —   |
| 71      | 0                                                            | —  | 5  | 2  | 0  | —  | —   | —   | 0   | 0   | —   |
| 72      | 0                                                            | —  | 8  | 7  | 7  | —  | —   | —   | 4   | 0   | —   |
| 73      | 0                                                            | —  | 9  | 8  | 7  | —  | —   | —   | 3   | 0   | —   |
| 74      | 0                                                            | —  | 8  | 5  | 4  | —  | —   | —   | 2   | 1   | —   |

\*Dashes indicate subjects were not sampled at these time points

†Subject failed to complete the self-assessment form

**Supplementary Table S3. Stability of target analytes in the breath collection device**

| <b>Analyte</b>   | <b>Analyte Stability (%) at Room Temperature (20-25°C)</b> |              |               |               |               |
|------------------|------------------------------------------------------------|--------------|---------------|---------------|---------------|
|                  | <b>Day 3</b>                                               | <b>Day 7</b> | <b>Day 10</b> | <b>Day 14</b> | <b>Day 30</b> |
| $\Delta^9$ -THC  | 91.3                                                       | 81.2         | 82.9          | 66.2          | 55.6          |
| CBN              | 104.5                                                      | 100.0        | 107.3         | 87.9          | 74.4          |
| CBC              | 100.6                                                      | 89.1         | 89.9          | 82.2          | 75.6          |
| CBG              | 97.5                                                       | 87.6         | 97.8          | 75.0          | 56.5          |
| $\Delta^9$ -THCV | 79.7                                                       | 68.1         | 69.8          | 56.5          | 47.1          |
| CBGA             | 99.4                                                       | 110.9        | 110.4         | No data       | 114.3         |

**Supplementary Table S4. Determination of cannabinoids in exhaled breath: intra-day method validation data**

| <b>Concentration<br/>(ng/mL)</b> | <b>Parameter</b> | <b><math>\Delta^9</math>-THC</b> | <b>CBN</b> | <b>CBC</b> | <b><math>\Delta^9</math>-THCV</b> |
|----------------------------------|------------------|----------------------------------|------------|------------|-----------------------------------|
| 2.5<br>(N=5)                     | Accuracy (%)     | -5.1                             | 5.6        | -0.2       | 4.7                               |
|                                  | Precision (%)    | 3.8                              | 9.1        | 4.6        | 4.8                               |
| 5.0<br>(N=5)                     | Accuracy (%)     | -12.2                            | -9.6       | -8.7       | -10.4                             |
|                                  | Precision (%)    | 6.0                              | 12.8       | 5.3        | 7.0                               |
| 10<br>(N=5)                      | Accuracy (%)     | -5.0                             | -11.7      | -6.8       | -7.1                              |
|                                  | Precision (%)    | 3.3                              | 6.5        | 4.2        | 5.1                               |
| 25<br>(N=5)                      | Accuracy (%)     | -10.7                            | -13.3      | -8.9       | -9.3                              |
|                                  | Precision (%)    | 4.6                              | 4.3        | 6.9        | 5.2                               |
| 50<br>(N=5)                      | Accuracy (%)     | 2.0                              | 0.9        | 1.4        | 1.8                               |
|                                  | Precision (%)    | 3.8                              | 1.6        | 2.7        | 2.1                               |
| 100<br>(N=5)                     | Accuracy (%)     | -5.0                             | -7.4       | -5.4       | -5.2                              |
|                                  | Precision (%)    | 1.4                              | 3.4        | 2.6        | 2.7                               |

**Supplementary Table S5. Determination of cannabinoids in exhaled breath: inter-day method validation data determined on 5 consecutive days**

| Concentration (ng/mL) | Parameter     | $\Delta^9$ -THC | CBN  | CBC   | $\Delta^9$ -THCV |
|-----------------------|---------------|-----------------|------|-------|------------------|
| 3.0<br>(N=5)          | Accuracy (%)  | -1.9            | 4.9  | -11.9 | -2.1             |
|                       | Precision (%) | 12.6            | 24.8 | 18.2  | 10.0             |
| 45<br>(N=5)           | Accuracy (%)  | -0.7            | -0.8 | -5.0  | -0.5             |
|                       | Precision (%) | 8.0             | 11.7 | 5.2   | 11.4             |
| 90<br>(N=5)           | Accuracy (%)  | 6.4             | 7.5  | 3.9   | 14.7             |
|                       | Precision (%) | 5.3             | 7.3  | 12.6  | 11.4             |



**Supplementary Table S6. Determination of cannabinoids in exhaled breath: extraction efficiency**

| <b>Concentration<br/>(ng/mL)</b> | <b>Extraction Efficiency (%)</b> |            |            |                                   |
|----------------------------------|----------------------------------|------------|------------|-----------------------------------|
|                                  | <b><math>\Delta^9</math>-THC</b> | <b>CBN</b> | <b>CBC</b> | <b><math>\Delta^9</math>-THCV</b> |
| 20<br>(N=6)                      | 63.8                             | 56.7       | 70.2       | 54.2                              |
| 80<br>(N=6)                      | 51.4                             | 42.7       | 52.0       | 45.0                              |

**Supplementary Table S7. Pre- and post-smoking  $\Delta^9$ -THC half-lives in breath**

| Subject | $\Delta^9$ -THC Half-Life (minutes)   |      |       |       |       |       |        |
|---------|---------------------------------------|------|-------|-------|-------|-------|--------|
|         | Time Intervals Post-Smoking (minutes) |      |       |       |       |       |        |
|         | Pre-Smoking                           | 0-10 | 0-20  | 20-40 | 20-60 | 40-60 | 60-80  |
| 31      | 61.44                                 | —*   | 4.73  | —     | 19.19 | —     | —      |
| 32      | —                                     | —    | 3.26  | —     | 7.48  | —     | —      |
| 33      | —                                     | —    | 6.23  | —     | 8.79  | —     | —      |
| 34      | —                                     | —    | 4.38  | —     | 16.31 | —     | —      |
| 35      | 17.39                                 | —    | 5.55  | —     | 9.71  | —     | 21.22  |
| 36      | 7.67                                  | —    | 3.13  | —     | 9.00  | —     | 24.58  |
| 37      | —                                     | —    | 4.36  | —     | 4.00  | —     | —      |
| 38      | —                                     | —    | 3.57  | —     | —     | —     | —      |
| 39      | —                                     | —    | 3.96  | —     | 6.11  | —     | —      |
| 40      | —                                     | —    | 3.28  | —     | 12.58 | —     | —      |
| 41      | —                                     | 5.40 | 4.81  | 6.86  | 10.34 | 20.96 | —      |
| 42      | —                                     | 9.40 | 5.79  | 9.50  | 10.21 | 11.03 | —      |
| 43      | —                                     | 5.50 | 6.25  | 8.39  | 10.72 | 14.83 | —      |
| 44      | —                                     | 2.92 | 2.83  | 8.20  | 28.63 | —     | —      |
| 45      | —                                     | 3.32 | 3.15  | —     | —     | —     | —      |
| 46      | —                                     | 4.50 | 3.24  | —     | 46.20 | 17.17 | —      |
| 47      | —                                     | —    | 7.15  | 6.28  | 7.82  | 10.37 | —      |
| 48      | —                                     | 5.19 | 3.39  | 6.44  | 9.12  | 15.58 | —      |
| 49      | —                                     | 2.23 | 2.02  | 7.03  | 10.68 | 22.22 | —      |
| 50      | —                                     | 1.75 | 2.52  | 6.34  | 11.86 | 91.24 | —      |
| 51      | —                                     | 3.52 | 3.45  | 13.55 | 14.64 | 15.93 | —      |
| 52      | —                                     | —    | 2.39  | —     | —     | —     | —      |
| 53      | —                                     | —    | 2.89  | —     | —     | —     | —      |
| 54      | —                                     | —    | 3.32  | —     | —     | —     | —      |
| 55      | —                                     | —    | 2.46  | —     | —     | —     | —      |
| 56      | —                                     | —    | 3.56  | —     | —     | —     | —      |
| 57      | —                                     | —    | 6.03  | —     | —     | —     | —      |
| 58      | —                                     | —    | 3.39  | —     | —     | —     | —      |
| 59      | —                                     | —    | 4.35  | —     | —     | —     | —      |
| 60      | —                                     | —    | 3.89  | —     | —     | —     | —      |
| 61      | —                                     | —    | 3.29  | —     | —     | —     | —      |
| 62      | —                                     | —    | 1.65  | —     | 10.29 | —     | 6.81   |
| 63      | —                                     | —    | 13.90 | —     | 7.49  | —     | 24.18  |
| 64      | —                                     | —    | 4.30  | —     | 11.05 | —     | 119.06 |
| 65      | —                                     | —    | 4.66  | —     | 11.22 | —     | 14.18  |

\*Dash indicates half-life not calculable

**Supplementary Table S8. Post-smoking CBN half-lives in breath**

| Subject | CBN Half-Life (min)               |       |       |       |
|---------|-----------------------------------|-------|-------|-------|
|         | Time Intervals Post-Smoking (min) |       |       |       |
|         | 0-10                              | 0-20  | 20-60 | 40-60 |
| 31      | —*                                | —     | —     | —     |
| 32      | —                                 | 2.70  | —     | —     |
| 33      | —                                 | —     | —     | —     |
| 34      | —                                 | —     | —     | —     |
| 35      | —                                 | 4.99  | 8.81  | 12.76 |
| 36      | —                                 | 2.67  | —     | —     |
| 37      | —                                 | —     | —     | —     |
| 38      | —                                 | —     | —     | —     |
| 39      | —                                 | —     | —     | —     |
| 40      | —                                 | —     | —     | —     |
| 41      | 5.01                              | —     | —     | —     |
| 42      | 8.77                              | 5.43  | —     | —     |
| 43      | 5.29                              | —     | —     | —     |
| 44      | 2.24                              | 2.74  | 61.67 | —     |
| 45      | 2.69                              | 3.43  | —     | —     |
| 46      | 3.86                              | —     | —     | —     |
| 47      | 2.21                              | 2.66  | —     | —     |
| 48      | 4.28                              | 3.08  | —     | —     |
| 49      | 1.76                              | 1.55  | —     | —     |
| 50      | 1.50                              | 2.38  | —     | —     |
| 51      | 2.99                              | —     | —     | —     |
| 52      | —                                 | —     | —     | —     |
| 53      | —                                 | —     | —     | —     |
| 54      | —                                 | 2.79  | —     | —     |
| 55      | —                                 | 1.97  | —     | —     |
| 56      | —                                 | 2.94  | —     | —     |
| 57      | —                                 | —     | —     | —     |
| 58      | —                                 | 2.82  | —     | —     |
| 59      | —                                 | 3.60  | —     | —     |
| 60      | —                                 | 3.31  | —     | —     |
| 61      | —                                 | 2.82  | —     | —     |
| 62      | —                                 | 1.46  | —     | —     |
| 63      | —                                 | 15.60 | —     | —     |
| 64      | —                                 | —     | —     | —     |
| 65      | —                                 | 4.12  | —     | —     |

\*Dash indicates half-life not calculable

**Supplementary Table S9. Post-smoking CBC half-lives in breath**

| Subject | Half-Life (min)                   |       |
|---------|-----------------------------------|-------|
|         | Time Intervals Post-Smoking (min) |       |
|         | 0-10                              | 0-20  |
| 31      | —*                                | 5.85  |
| 32      | —                                 | 2.84  |
| 33      | —                                 | 6.20  |
| 34      | —                                 | —     |
| 35      | —                                 | 4.67  |
| 36      | —                                 | 2.71  |
| 37      | —                                 | —     |
| 38      | —                                 | —     |
| 39      | —                                 | —     |
| 40      | —                                 | —     |
| 41      | 5.28                              | —     |
| 42      | 10.07                             | 6.25  |
| 43      | —                                 | —     |
| 44      | 2.30                              | —     |
| 45      | 3.16                              | —     |
| 46      | 4.36                              | —     |
| 47      | 2.20                              | 2.73  |
| 48      | 4.54                              | 3.16  |
| 49      | 1.80                              | 1.77  |
| 50      | 1.55                              | 3.82  |
| 51      | 3.29                              | —     |
| 52      | —                                 | —     |
| 53      | —                                 | 2.75  |
| 54      | —                                 | 2.87  |
| 55      | —                                 | 2.04  |
| 56      | —                                 | 2.95  |
| 57      | —                                 | —     |
| 58      | —                                 | 2.79  |
| 59      | —                                 | 3.81  |
| 60      | —                                 | 3.28  |
| 61      | —                                 | 2.86  |
| 62      | —                                 | 1.48  |
| 63      | —                                 | 11.50 |
| 64      | —                                 | —     |
| 65      | —                                 | —     |

\*Dash indicates half-life not calculable

**Supplementary Table S10. Post-smoking  $\Delta^9$ -THCV half-lives in breath**

| Subject | Half-Life (min)                   |      |
|---------|-----------------------------------|------|
|         | Time Intervals Post-Smoking (min) |      |
|         | 0-10                              | 0-20 |
| 31      | —*                                | —    |
| 32      | —                                 | —    |
| 33      | —                                 | —    |
| 34      | —                                 | —    |
| 35      | —                                 | 3.94 |
| 36      | —                                 | —    |
| 37      | —                                 | —    |
| 38      | —                                 | —    |
| 39      | —                                 | —    |
| 40      | —                                 | —    |
| 41      | 6.20                              | —    |
| 42      | 13.67                             | —    |
| 43      | —                                 | —    |
| 44      | 2.09                              | —    |
| 45      | 2.86                              | —    |
| 46      | —                                 | —    |
| 47      | 2.17                              | —    |
| 48      | 4.40                              | —    |
| 49      | 1.67                              | —    |
| 50      | 1.48                              | —    |
| 51      | 3.32                              | —    |
| 52      | —                                 | —    |
| 53      | —                                 | —    |
| 54      | —                                 | 2.71 |
| 55      | —                                 | 1.96 |
| 56      | —                                 | 2.62 |
| 57      | —                                 | —    |
| 58      | —                                 | 2.72 |
| 59      | —                                 | 3.38 |
| 60      | —                                 | —    |
| 61      | —                                 | —    |
| 62      | —                                 | —    |
| 63      | —                                 | —    |
| 64      | —                                 | —    |
| 65      | —                                 | —    |

\*Dash indicates half-life not calculable

**Supplementary Table S11. Post-smoking CBG half-lives in breath**

| Subject | CBG Half-Life (min)               |       |
|---------|-----------------------------------|-------|
|         | Time Intervals Post-Smoking (min) |       |
|         | 0-10                              | 0-20  |
| 31      | —*                                | —     |
| 32      | —                                 | 2.74  |
| 33      | —                                 | 6.20  |
| 34      | —                                 | —     |
| 35      | —                                 | 4.48  |
| 36      | —                                 | 2.66  |
| 37      | —                                 | —     |
| 38      | —                                 | —     |
| 39      | —                                 | —     |
| 40      | —                                 | —     |
| 41      | 4.50                              | 3.93  |
| 42      | 8.69                              | —     |
| 43      | 4.90                              | —     |
| 44      | 2.09                              | 2.41  |
| 45      | 2.61                              | —     |
| 46      | 4.50                              | —     |
| 47      | 1.96                              | 2.62  |
| 48      | 4.22                              | 2.96  |
| 49      | 1.79                              | —     |
| 50      | 1.45                              | 2.56  |
| 51      | 3.43                              | —     |
| 52      | —                                 | —     |
| 53      | —                                 | 2.42  |
| 54      | —                                 | 2.69  |
| 55      | —                                 | 1.92  |
| 56      | —                                 | 2.67  |
| 57      | —                                 | —     |
| 58      | —                                 | 2.80  |
| 59      | —                                 | 3.65  |
| 60      | —                                 | 3.00  |
| 61      | —                                 | 2.39  |
| 62      | —                                 | 1.45  |
| 63      | —                                 | 15.96 |
| 64      | —                                 | —     |
| 65      | —                                 | 3.66  |

\*Dash indicates half-life not calculable

**Supplementary Table S12. Summary of cannabinoid half-lives in breath post-smoking: back-to-back sampling strategy**

| Subject         | Cannabinoid Half-Lives (min) 20 & 40 Minutes Post-Smoking |     |     |      |      |     |     |    |                  |    |
|-----------------|-----------------------------------------------------------|-----|-----|------|------|-----|-----|----|------------------|----|
|                 | $\Delta^9$ -THC                                           |     | CBN |      | CBC  |     | CBG |    | $\Delta^9$ -THCV |    |
|                 | 20                                                        | 40  | 20  | 40   | 20   | 40  | 20  | 40 | 20               | 40 |
| 66              | 1.2                                                       | —*  | 1.1 | —    | 1.0  | —   | 0.7 | —  | 0.9              | —  |
| 67              | 1.9                                                       | 2.2 | 2.0 | 2.9  | 2.2  | 2.3 | 1.6 | —  | 1.9              | —  |
| 68              | 2.3                                                       | 9.9 | 2.3 | 4.8  | 2.0  | 3.5 | 1.3 | —  | 2.1              | —  |
| 69              | 2.9                                                       | —   | 2.7 | —    | 2.7  | —   | 2.6 | —  | 2.8              | —  |
| 70              | 1.0                                                       | 3.7 | —   | —    | —    | —   | —   | —  | —                | —  |
| 71              | 1.4                                                       | —†  | —   | —    | 1.3  | —   | —   | —  | —                | —  |
| 72              | 2.1                                                       | 5.9 | 1.8 | —    | 2.0  | 5.2 | 2.1 | —  | 1.6              | —  |
| 73              | 7.3                                                       | 8.6 | 6.4 | 10.7 | 11.8 | —   | —   | —  | 3.8              | —  |
| 74              | 11.8                                                      | —   | —   | —    | —    | —   | —   | —  | —                | —  |
| <b>Average=</b> | 3.5                                                       | 6.1 | 2.7 | 6.1  | 3.3  | 3.6 | 1.7 | —  | 2.2              | —  |
| <b>SD=</b>      | 3.6                                                       | 3.2 | 1.9 | 4.1  | 3.8  | 1.5 | 0.7 | —  | 1.0              | —  |
| <b>N=</b>       | 9                                                         | 5   | 6   | 3    | 7    | 3   | 5   | —  | 6                | —  |

\*Half-life not calculable.

†Outlier value (53.1) removed.
